# Supplementary material for: Hepatocyte-derived DPP4 regulates portal GLP-1 bioactivity, modulates glucose production, and when absent influences NAFLD progression
Source: PubMed Central journal article supplement (PMC9977314; doi:10.1172/jci.insight.154314), 2023-01-24
Supplement: jciinsight-8-154314-s112.pdf [file jciinsight-8-154314-s112.pdf]

## Supplementary Material

Hepatocyte-derived DPP4 regulates portal GLP-1 bioactivity, glucose production and its absence alters liver disease progression

Authors: Natasha A. Trzaskalski<sup>1,2\*</sup>, Branka Vulesevic<sup>1,2\*</sup>, My-Anh Nguyen<sup>1,2</sup>, Natasha Jeraj<sup>1,2</sup>, Evgenia Fadzeyeva<sup>1,2</sup>, Nadya M. Morrow<sup>1,2</sup>, Cassandra A. A. Locatelli<sup>1,2</sup>, Nicole Travis<sup>1,2</sup>, Antonio A. Hanson<sup>1,2</sup>, Julia R.C. Nunes<sup>1,3,4</sup>, Conor O'Dwyer<sup>1,3,4</sup>, Jelske N. van der Veen<sup>5</sup>, Ilka Lorenzen-Schmidt<sup>2</sup>, Rick Seymour<sup>2</sup>, Serena M. Pulente<sup>1,2</sup>, Andrew C. Clément<sup>1,2</sup>, Angela M. Crawley<sup>1,3,6,7</sup>, René L. Jacobs<sup>5</sup>, Mary Anne Doyle<sup>8</sup>, Curtis L. Cooper<sup>6,9</sup>, Kyoung-Han Kim<sup>2,10</sup>, Morgan D. Fullerton<sup>1,3,4</sup>, Erin E. Mulvihill<sup>1,2,3,11</sup> &

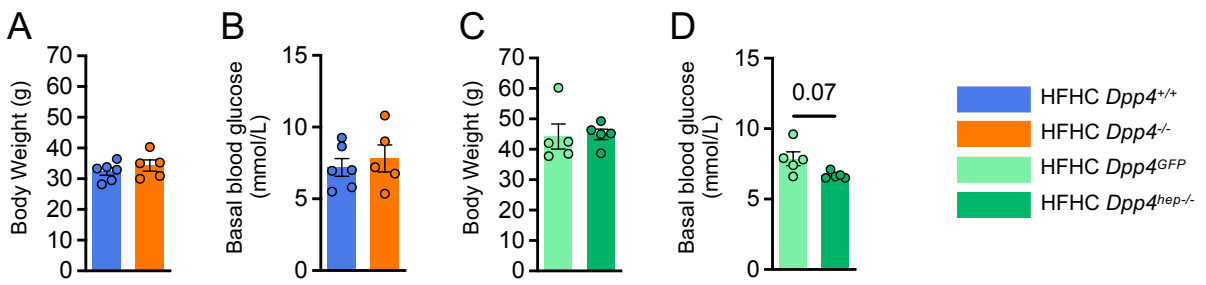

Supplementary Figure 1: Body weight and basal blood glucose in (A-B) HFHC-fed *Dpp4*<sup>+/+</sup> and *Dpp4*<sup>-/-</sup>, and (C-D) *Dpp4*<sup>GFP</sup> and *Dpp4*<sup>hep-/-</sup> mice, respectively, used for hyperinsulinemic-euglycemic clamp experiments. Data are presented as the means  $\pm$  SEM, analyzed by unpaired students t-test with Welch's correction, ns  $p > 0.05$ .

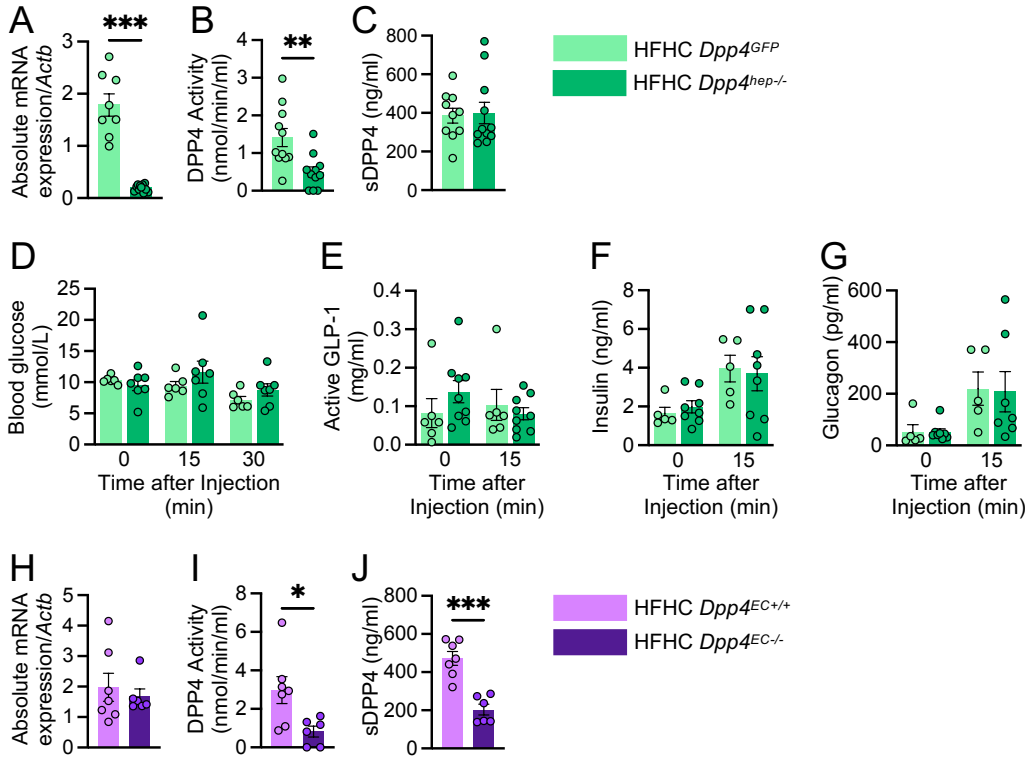

Supplementary Figure 2: (A) *Dpp4* mRNA abundance in the liver (relative to *Actb*), (B) fasting plasma DPP4 activity, and (C) plasma DPP4 protein in *Dpp4*<sup>GFP</sup> and *Dpp4*<sup>hep-/-</sup> mice. (D) Blood glucose, (E) active GLP-1, (F) insulin and (G) glucagon during an arginine tolerance test at baseline, 15- and 30-minutes after intraperitoneal injection in *Dpp4*<sup>GFP</sup> and *Dpp4*<sup>hep-/-</sup> mice fed a HFHC diet for 4 weeks. (H) *Dpp4* mRNA abundance in the liver (relative to *Actb*), (I) fasting plasma DPP4 activity and (J) plasma DPP4 protein in *Dpp4*<sup>EC+/+</sup> mice and *Dpp4*<sup>EC-/-</sup> mice. Data are presented as the means  $\pm$  SEM, analyzed by unpaired students t-test with Welch's correction, ns  $p < 0.05$ , \* $p = 0.01-0.05$ , \*\* $p = 0.001-0.01$ , \*\*\* $p = 0.0001-0.001$ .

■ HFHC *Dpp4*<sup>+/+</sup>     ■ HFHC *Dpp4*<sup>GFP</sup>  
■ HFHC *Dpp4*<sup>-/-</sup>     ■ HFHC *Dpp4*<sup>hep-/-</sup>

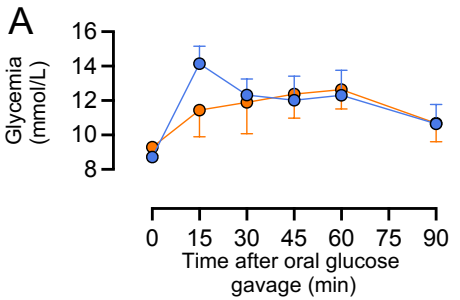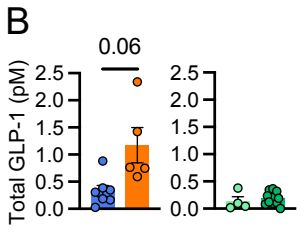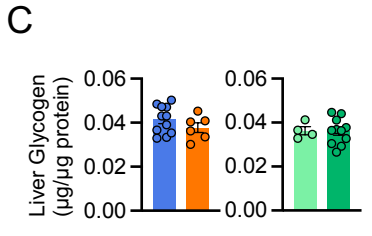

Supplementary Figure 3: (A) Oral glucose tolerance test in HFHC-fed *Dpp4*<sup>+/+</sup> and *Dpp4*<sup>-/-</sup> mice and HFHC-fed *Dpp4*<sup>GFP</sup> and *Dpp4*<sup>hep-/-</sup> mice. (B) Total GLP-1 15-minutes post-oral glucose gavage in HFHC-fed *Dpp4*<sup>+/+</sup> and *Dpp4*<sup>-/-</sup> mice and HFHC-fed *Dpp4*<sup>GFP</sup> and *Dpp4*<sup>hep-/-</sup> mice. (C) Liver glycogen content in HFHC-fed mice after 24 weeks. Data are presented as the means ± SEM. Time-course data is analyzed by two-way ANOVA with Tukey's multiple comparisons post hoc test, remaining data analyzed by unpaired students t-test with Welch's correction, ns  $p < 0.05$ .

■ SLD *Dpp4*<sup>+/+</sup>    ■ SLD *Dpp4*<sup>-/-</sup>    ■ HFHC *Dpp4*<sup>GFP</sup>  
■ HFHC *Dpp4*<sup>+/+</sup>    ■ HFHC *Dpp4*<sup>-/-</sup>    ■ HFHC *Dpp4*<sup>hep-/-</sup>

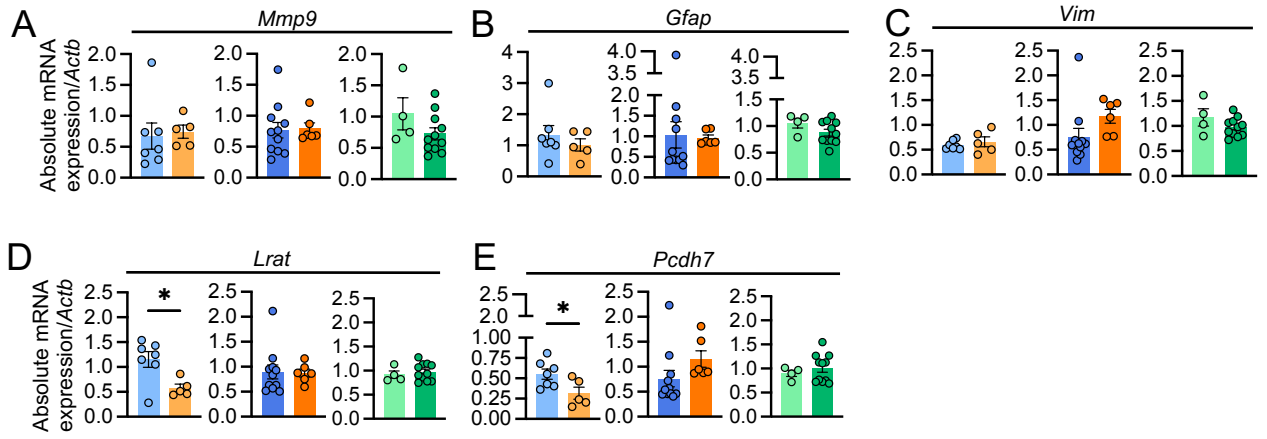

Supplementary Figure 4: Liver mRNA abundance (relative to *Actb*) for (A) *Mmp9*, (B) *Gfap*, (C) *Vim*, (D) *Lrat* and (E) *Pcdh7*. Data are presented as the means  $\pm$  SEM, analyzed by unpaired students t-test with Welch's correction, ns  $p < 0.05$ , \* $p = 0.01-0.05$ .

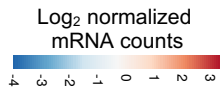

SLD *Dpp4*<sup>+/+</sup> HFHC *Dpp4*<sup>+/+</sup>

SLD *Dpp4*<sup>-/-</sup> HFHC *Dpp4*<sup>-/-</sup>

HFHC *Dpp4*<sup>GFP</sup> HFHC *Dpp4*<sup>hep-/-</sup>

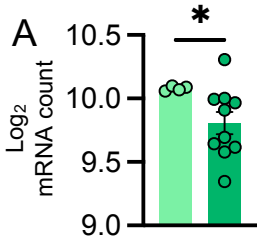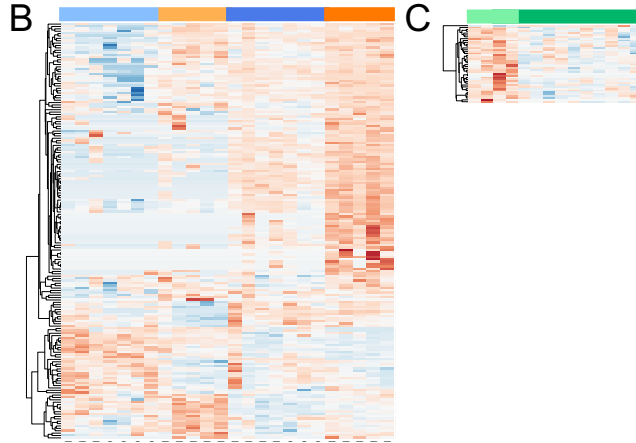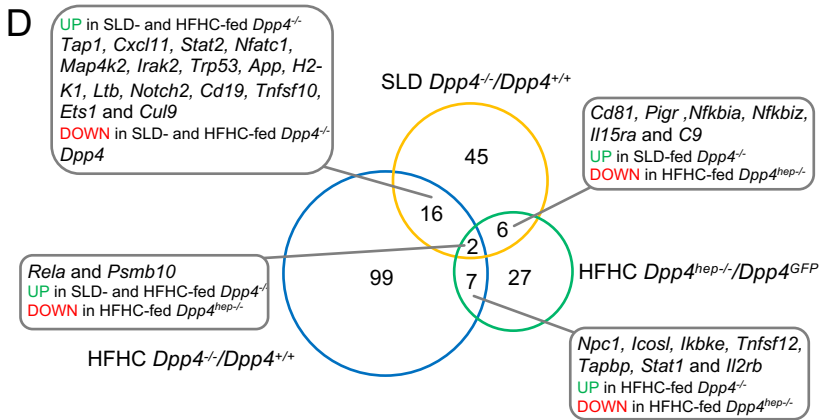

Supplementary Figure 5: (A) Log<sub>2</sub> mRNA count of DPP4 in liver tissue. Supervised hierarchical cluster analysis of significantly differentially expressed genes in liver tissue from (B) SLD- and HFHC-fed *Dpp4*<sup>+/+</sup> and *Dpp4*<sup>-/-</sup> mice, and (C) *Dpp4*<sup>GFP</sup> and *Dpp4*<sup>hep-/-</sup> mice, using the correlation distance method with average linkage, coloured by the log<sub>2</sub> normalized mRNA count. (F) Venn diagram depicting number of genes identified as significantly differentially expressed in each comparison and overlap. Data are presented as the means ± SEM, analyzed by unpaired students t-test with Welch's correction, ns p>0.05 and \*p=0.01-0.05.

HFHC *Dpp4*<sup>+/+</sup>    HFHC *Dpp4*<sup>-/-</sup>    HFHC *Dpp4*<sup>GFP</sup>    HFHC *Dpp4*<sup>hep-/-</sup>

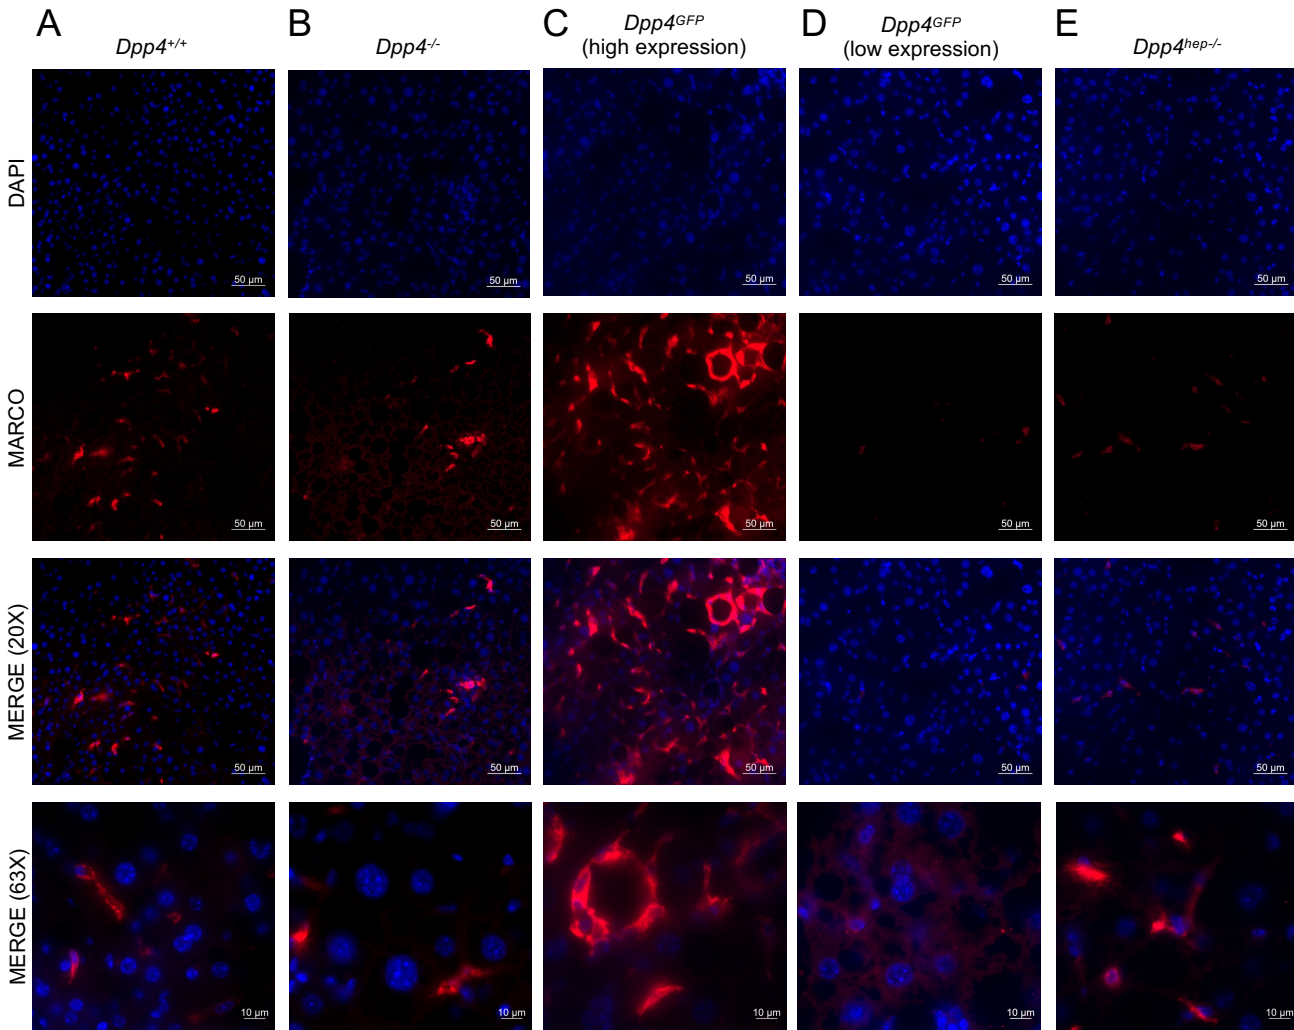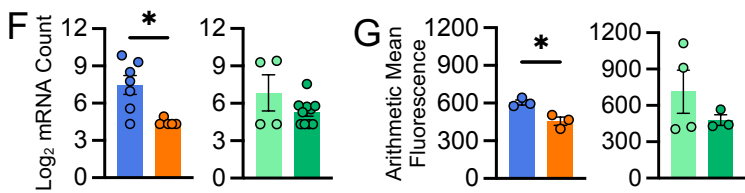

Supplementary Figure 6: Representative immunofluorescent images of MARCO in liver at 20X and 63X magnification for (A) HFHC-fed *Dpp4*<sup>+/+</sup>, (B) HFHC-fed *Dpp4*<sup>-/-</sup>, (C) HFHC-fed *Dpp4*<sup>GFP</sup> (high expression sample), (D) HFHC-fed *Dpp4*<sup>GFP</sup> (low expression sample) and (E) *Dpp4*<sup>hep-/-</sup> mice (scale bar at 20X = 50μm, scale bar at 63X = 10μm; 6 regions of interest, n=3-4). (F) NanoString  $\log_2$  mRNA count for Marco (n=4-11). (G) Arithmetic mean fluorescence of MARCO. Data are presented as the means  $\pm$  SEM, analyzed by unpaired students t-test with Welch's correction, ns  $p > 0.05$ , \* $p = 0.01-0.05$ .

■ SLD *Dpp4*<sup>+/+</sup>    ■ SLD *Dpp4*<sup>-/-</sup>    ■ HFHC *Dpp4*<sup>GFP</sup>  
■ HFHC *Dpp4*<sup>+/+</sup>    ■ HFHC *Dpp4*<sup>-/-</sup>    ■ HFHC *Dpp4*<sup>hep-/-</sup>

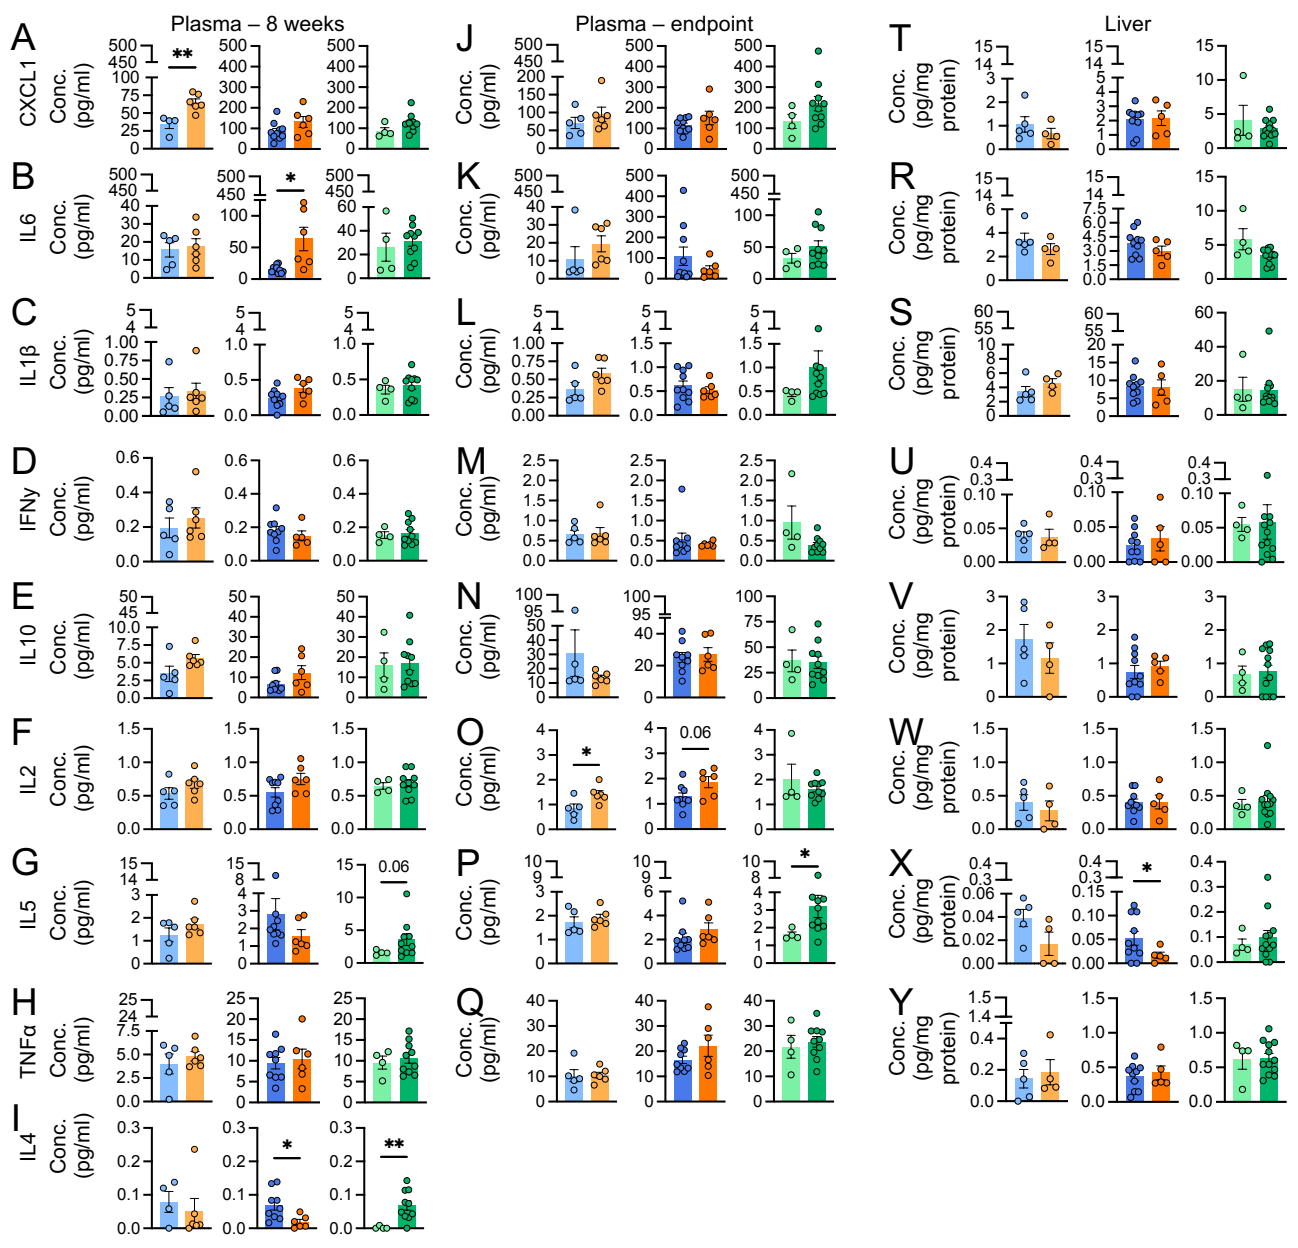

Supplementary Figure 7: Plasma concentration of chemokines in cytokines at (A-I) 8 weeks in plasma, (J-Q) endpoint in plasma and (R-Y) in liver tissue homogenates. Data are presented as the mean  $\pm$  SEM, analyzed by unpaired students t-test with Welch's correction, \*p=0.01-0.05, \*\*p=0.001-0.01.



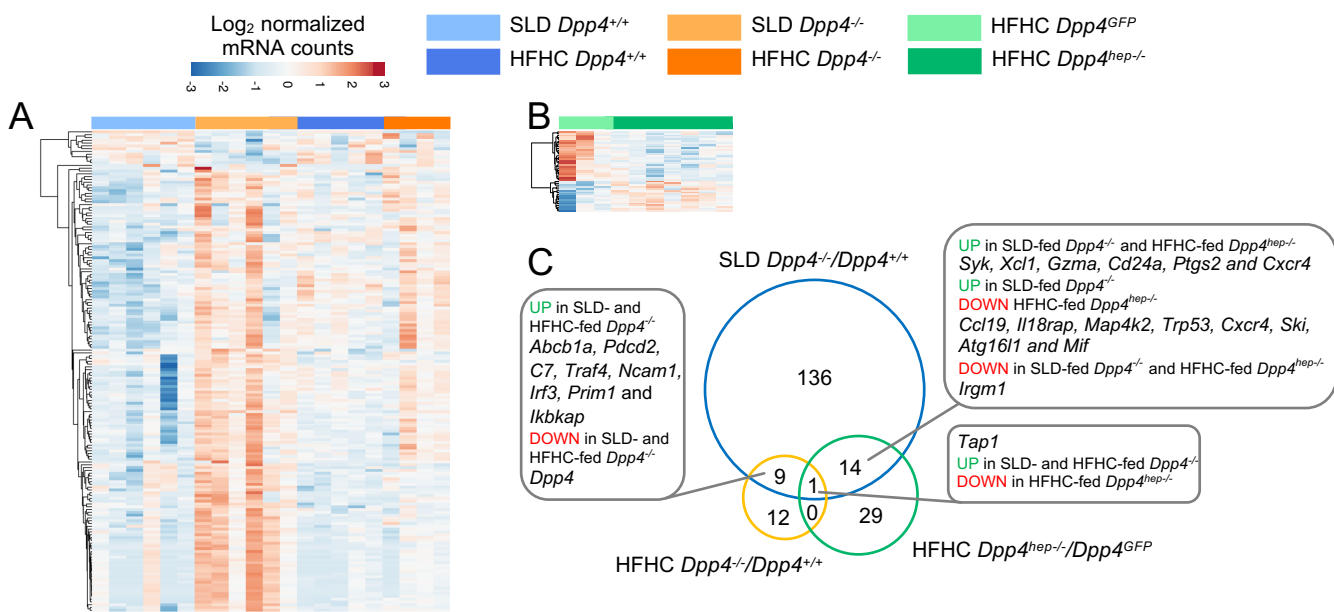

Supplementary Figure 8: Supervised hierarchical cluster analysis of significantly differentially expressed genes in F4/80+ cells isolated from liver tissue from (A) SLD- and HFHC-fed *Dpp4*<sup>+/+</sup> and *Dpp4*<sup>-/-</sup> mice, and (B) *Dpp4*<sup>GFP</sup> and *Dpp4*<sup>hep-/-</sup> mice, using the correlation distance method with average linkage, coloured by the log<sub>2</sub> normalized mRNA count. (C) Venn diagram depicting number of genes identified as significantly differentially expressed in each comparison and overlap.

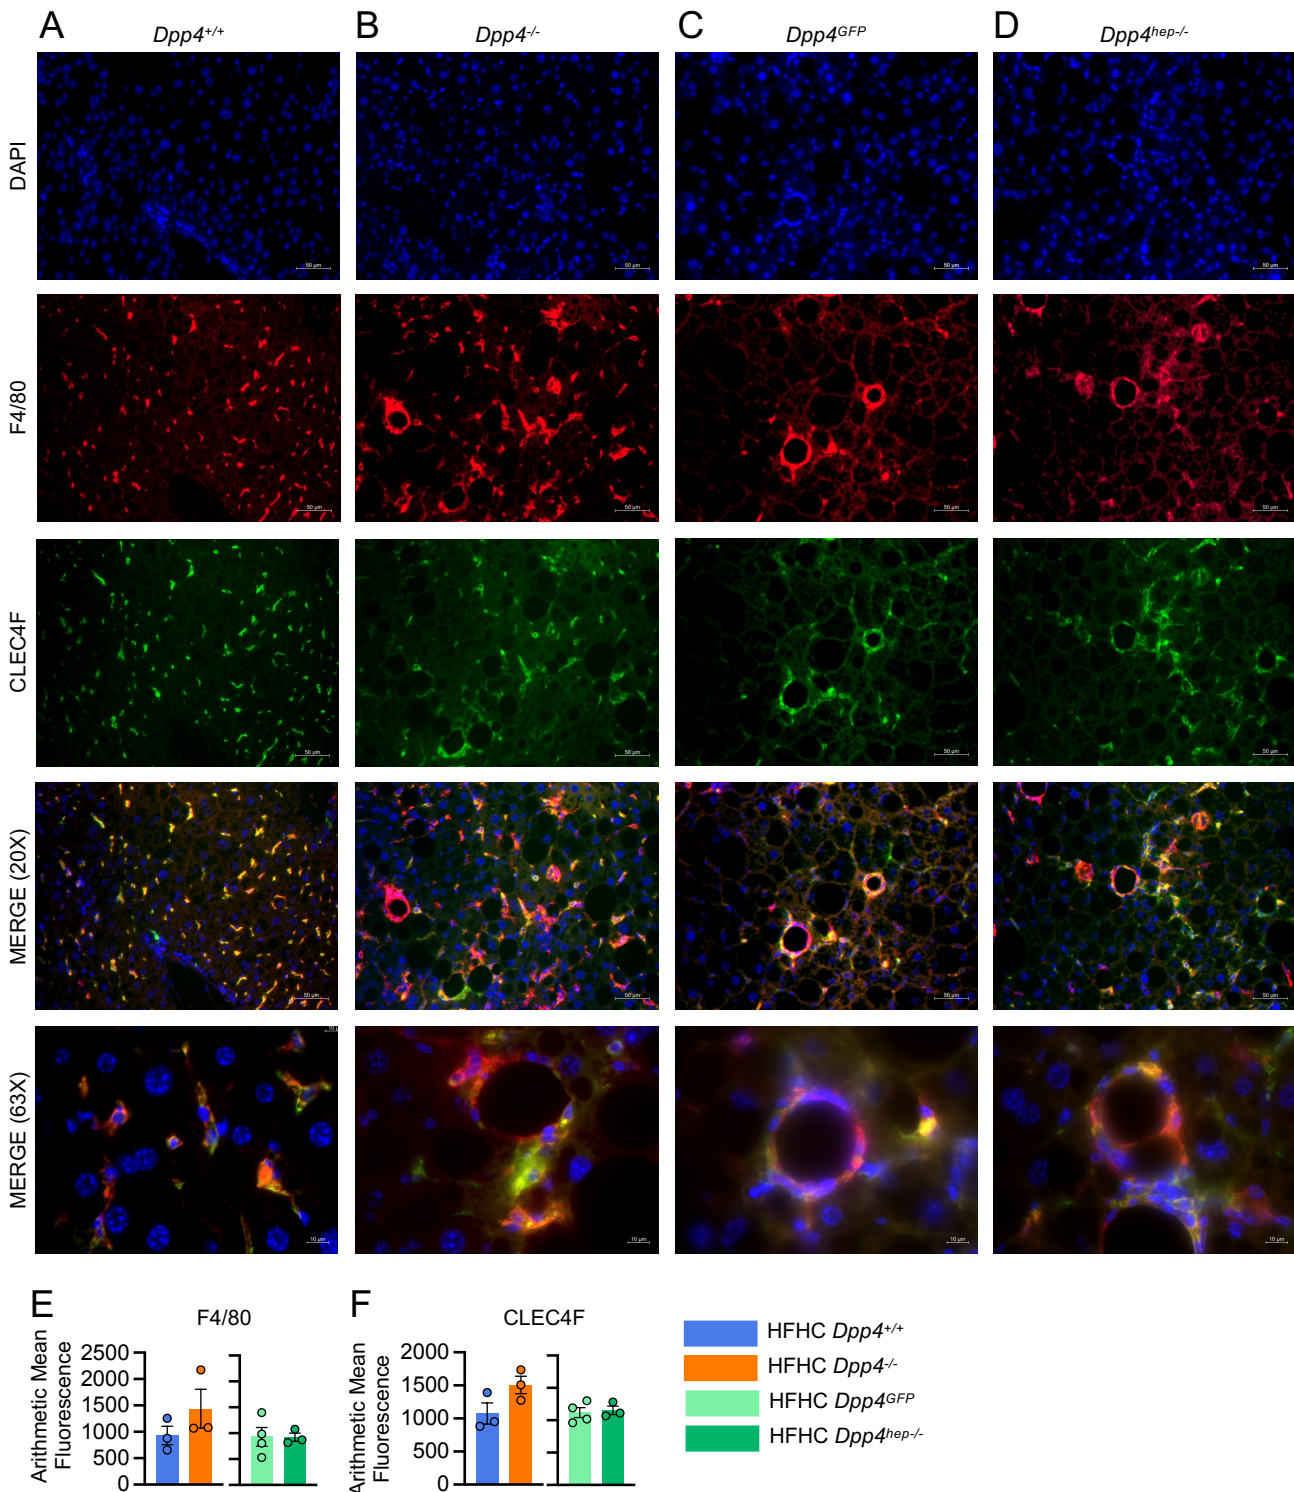

Supplementary Figure 9: Representative immunofluorescent images of F4/80 and CLEC4F in liver at 20X and 63X magnification for (A) HFHC-fed *Dpp4*<sup>+/+</sup>, (B) HFHC-fed *Dpp4*<sup>-/-</sup>, (C) HFHC-fed *Dpp4*<sup>GFP</sup> and (D) *Dpp4*<sup>hep-/-</sup> mice (scale bar at 20X = 50um, scale bar at 63X = 10um; 6 regions of interest, n=3-4). Arithmetic mean fluorescence of (E) F4/80 and (F) CLEC4F. Data are presented as the means ± SEM, analyzed by unpaired students t-test with Welch's correction, ns p>0.05.

■ *Pemt*<sup>+/+</sup> ■ *Pemt*<sup>-/-</sup>

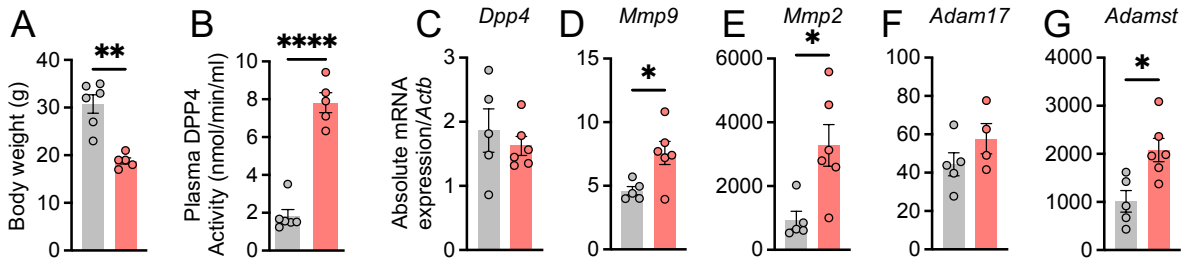

Supplementary Figure 10: (A) Body weight, (B) plasma DPP4 activity. Liver mRNA abundance of (C) *Dpp4*, (D) *Mmp9*, (E) *Mmp2*, (F) *Adam17* and (G) *Adamst* in *Pemt*<sup>+/+</sup> or *Pemt*<sup>-/-</sup> mice. Data are presented as the means ± SEM, analyzed by unpaired students t-test with Welch's correction, ns p>0.05, \*p=0.01-0.05, \*\*p=0.001-0.01, \*\*\*p=0.0001-0.001 and \*\*\*\*p<0.0001.

|                                                   | <i>Dpp4<sup>GFP</sup></i> | <i>Dpp4<sup>hep-/-</sup></i> |
|---------------------------------------------------|---------------------------|------------------------------|
| Fasting plasma DPP4 activity (nmol/min/ml)        | 0.86                      | 0.38                         |
| Fasting plasma DPP4 concentration (ng/ml)         | 250.50                    | 370.50                       |
| Absolute <i>Dpp4</i> mRNA Expression/ <i>Actb</i> | 1.24                      | 0.17                         |
| PV plasma DPP4 concentration (ng/ml)              | 159.50                    | 185.50                       |
| PV plasma active GLP-1 (mg/ml)                    | 1.29                      | 4.55                         |
| CP plasma active GLP-1 (mg/ml)                    | 0.18                      | 0.53                         |
| PV plasma active GIP (pM)                         | 6.33                      | 27.17                        |
| CP plasma active GIP (pM)                         | 1.50                      | 5.17                         |
| PV plasma insulin (ng/ml)                         | 5.37                      | 3.47                         |
| CP plasma insulin (ng/ml)                         | 2.31                      | 2.77                         |
| PV plasma glucagon (pg/ml)                        | 86.54                     | 32.63                        |
| CP plasma glucagon (pg/ml)                        | 10.20                     | 12.15                        |

Supplementary Table 1: Fasting and fed, plasma and liver DPP4 activity, concentration, active GLP-1, active GIP, insulin and glucagon from the portal vein (PV) or cardiac puncture (CP) 15 minutes after glucose bolus in aged (60 weeks), HFHC-fed *Dpp4<sup>GFP</sup>* and *Dpp4<sup>hep-/-</sup>* mice. Values are the mean (n=2/genotype)
